# Supplementary material for: Thanking our peer reviewers
Source: Oxford University Press journal article supplement (doi:10.1242/bio.017053), 2016-02-15
Supplement: bio017053supp.pdf [file bio017053supp.pdf]

## Reviewers for Biology Open 2015

Yasuhito Abe, Matsuyama Rehabilitation Hospital, Japan  
Naiche Adler, National Cancer Institute, USA.  
Markus Affolter, University of Basel, Switzerland.  
Ingi Agnarsson, University of Puerto Rico, USA.  
Javier Agusti, University of Oxford, UK.  
Nadav Ahituv, University of California, San Francisco, USA.  
Bungo Akiyoshi, University of Oxford, UK  
Hidenori Akutsu, NCCHD, Japan.  
Frederic Altare, Université de Nantes, France.  
Jeffrey Amack, SUNY Upstate Medical University, USA.  
Pradeep Ram Angia Sriram, Université Blaise Pascal, France.  
Robert Anholt, North Carolina State University, USA.  
Kristin Artinger, University of Colorado Denver, USA.  
Toshiki Asao, Shimane University, Japan.  
Jelle Atema, Boston University, USA.  
Chaitanya Athale, IISER Pune, India.  
Juliette Azimzadeh, Institut Jacques Monod, France.  
Ghows Azzam, Universiti Sains Malaysia, Malaysia.  
Luis Alberto Baena, University of Oxford, UK.  
Myriam Baes, KU Leuven, Belgium.  
Hans Bakker, Hannover Medical School, Germany.  
Brian Ballios, University of Toronto, Canada.  
Sophie Balmer, Memorial Sloan Kettering Cancer Center, USA.  
Jianqiang Bao, University of Texas MD Anderson Cancer Center, USA.  
Cedric Bardy, Salk Institute, USA.  
Jeffrey Barminko, The State University of New Jersey, USA.  
Alexis Barr, Institute of Cancer Research, UK.  
Andrew Bassett, MRC Functional Genomics Unit, UK.  
Eric Beers, Virginia Tech, USA.  
Frank Beier, University of Western Ontario, Canada.  
Audrey Bernut, CPBS, CNRS, France.  
Bharat Bhushan, Ohio State University, USA.  
Erhard Bieberich, Medical College of Georgia, USA.  
David Bilder, University of California-Berkeley, USA.  
Johannes Bischof, University of Zurich, Switzerland.  
Richard Blob, Clemson University, USA.  
Anais Boglino, Institut de Recerca i Tecnologia Agroalimentàries, Spain.  
Daniel Booth, University of Edinburgh, UK.  
Victoria Braithwaite, Penn State University, USA.  
Steven Britt, University of Colorado at Denver and Health Sciences Center, USA.  
Veronique Brodu, Institut Jacques Monod, France.

Susan Brown, Kansas State University, USA.  
Silvia Brunelli, DIBIT-HSR, Italy.  
Shawn Burgess, NHGRI/NIH, USA.  
Michael Buszczak, UT Southwestern Medical Center, USA.  
Juan Cabello, CIBIR (Centre for Biomedical Research of La Rioja), Spain.  
Silvia Campello, IRCCS Fondazione Santa Lucia, Italy.  
Marina Campione, CNR Institute of Neurosciences, Italy.  
Eric Campos, The Hospital for Sick Children, Toronto, Canada.  
Terence Capellini, Harvard University, USA.  
Radmila Capkova Frydrychova, Biology Center, Institute of Entomology, Czech Republic.  
Barbara Capuani, University of Rome Tor Vergata, Italy.  
Kristian Carlson, University of the Witwatersrand, South Africa.  
Christopher Carman, Harvard Medical School - Beth Israel Deaconess Medical Center, USA.  
Paulyn Cartwright, University of Kansas, USA.  
Cristina Cebrian, University of Michigan, USA.  
Sreekanth Chalasani, Salk Institute for Biological Studies, USA.  
Mark Chappell, University of California, Riverside, USA.  
Michel Chapuisat, University of Lausanne, Switzerland.  
Linxi Chen, University of South China, China.  
Qiang Chen, University of Michigan Medical School, USA  
Danian Chen, Lunenfeld-Tanenbaum Research Institute, Canada.  
Zi Chen, Thayer School of Engineering at Dartmouth, USA.  
Mustapha Cherkaoui-Malki, Universite de Bourgogne, France.  
Ajay Chitnis, NIH, USA.  
Je-Yong Choi, Kyungpook National University, Republic of Korea.  
Lionel Christiaen, NYU, USA.  
Dina Coertzen, University of Pretoria, South Africa.  
Bruce Cooper, Purdue University, USA.  
Kimberly Cooper, University of California San Diego, USA.  
Alenka Copic, Institut Jacques Monod, France.  
Joao Costa-Rodrigues, Universidade do Porto, Portugal.  
Evelyne Coudrier, Institut Curie, France.  
Kristen Crandell, University of Montana, USA.  
Michael Crognale, University of Nevada, Reno, USA.  
Vincent Croset, University of Oxford, UK.  
Paul Curley, University of Liverpool, UK.  
Randy Daughters, University of Minnesota, USA.  
Nicholas Davis, Wayne State University, USA.  
Bill Davison, University of Canterbury, New Zealand.  
Cristiano De Pittà, University of Padua, Italy.  
Christos Delidakis, Foundation for Research and Technology - Hellas (FORTH), Greece.  
Jyotsna Dhawan, Institute for Stem Cell Biol & Regenerative Medicine, India.  
Mark Dodding, Kings College London, UK.

Svetlana Dokudovskaya, Institut de Cancérologie Gustave Roussy, France.  
Mary Donohoe, Cornell University, USA.  
Rainer Duden, University of Lubeck, Germany.  
Viji Draviam, University of Cambridge, UK.  
Iain Drummond, Massachusetts General Hospital and Harvard Medical School, USA.  
Xin Duan, Harvard University, USA.  
Maud Dumoux, Institute of Structural and Molecular Biology, UK.  
Alain Duperray, Inserm U823, France.  
Melanie Eckersley-Maslin, The Babraham Institute, UK.  
John Eggenschwiler, University of Georgia, USA.  
Yechiel Elkabetz, Tel Aviv University, Israel.  
Amany Elshorbagy, University of Oxford, UK.  
Diana Escalante-Alcalde, Instituto de Fisiología Celular-UNAM, Mexico.  
Alison Every, University of Melbourne, Australia.  
Elisabetta Ferretti, DanStem, Denmark.  
Kyle Flann, University of Portland, USA.  
Ann Foley, Clemson University College of Engineering, USA.  
Eric Folker, Boston College, USA.  
Eric Fontaine, Inserm, Joseph Fournier University, France.  
Diego Franco, University of Jaén, Spain.  
Uri Frank, National University of Ireland, Galway, Ireland.  
Gareth Fraser, University of Sheffield, UK.  
Stuart Fraser, The University of Sydney, Australia.  
Elisa Frasnelli, University of Exeter, UK.  
Laina Freyer, Memorial Sloan Kettering Cancer Center, USA.  
Jennifer Friedman, UC San Diego School of Medicine, USA.  
Deborah Galson, University of Pittsburgh, USA.  
Laura Gammill, University of Minnesota, USA.  
Danielle Garsin, The University of Texas Health Science Center at Houston, USA.  
Marta Giacomello, Dulbecco-Telethon Institute, Italy.  
Tereza Giannini, University of Sao Paulo, Brazil.  
Douglas Glazier, Juniata College, USA.  
Hans-Dieter Görtz, University of Stuttgart, Germany.  
Nicole Gorfinkiel, Universidad Autónoma de Madrid, Spain  
Peter Grant, Princeton University, USA.  
Thomas Greb, Ruprecht-Karls University Heidelberg, Germany.  
Colin Green, University of Auckland, New Zealand.  
Alex Gregorieff, Lunenfeld-Tanenbaum Research Institute, Canada.  
Francesca Grespi, University of Padova, Italy.  
Elon Donald Gullberg, University of Bergen, Norway.  
Ufuk Günesdogan, University of Cambridge, UK.  
Lars Gustafsson, Uppsala University, Sweden.  
Marc Halfon, SUNY at Buffalo, USA.  
Lewis Halsey, Roehampton University, UK.

Frederike Hanke, University of Rostock, Germany.  
Tony Harris, University of Toronto, Canada.  
Timothy Hawes, University of Otago, New Zealand.  
Marie Herberstein, Macquarie University, Australia.  
Tory Herman, University of Oregon, USA.  
Jean-Louis Hermann, Université de Versailles Saint-Quentin-en-Yvelines, France.  
Henry Higgs, Dartmouth University, USA.  
Kent Hill, UCLA, USA.  
Robert Hill, MRC Human Genetics Unit, UK.  
Stanley Hillyard, University of Nevada, USA.  
Julian Hillyer, Vanderbilt University, USA.  
Bernd Hoffmann, Research Centre Jülich, Germany.  
Sally Horne-Badovinac, University of Chicago, USA.  
Bernice Huang, Virginia Commonwealth University, USA.  
Katerina Jandová, Charles University in Prague, Czech Republic.  
Steve Jean, Université de Sherbrooke, Canada.  
Abbie Jensen, University of Massachusetts-Amherst, USA.  
Fang-Xu Jiang, Western Australian Institute for Medical Research, Australia.  
Mats Johansson, University of Wisconsin, USA.  
Jonathan Jones, Washington State University, USA.  
Yashpal Kanwar, Northwestern University, USA.  
Alex Keene, Florida Atlantic University, USA.  
Helena Khaliullina, University of Cambridge, UK.  
Mustafa Khokha, Yale School of Medicine, USA.  
Kyung Sook Kim, Kyung Hee University, Republic of Korea.  
Wayne Kimpton, University of Melbourne, Australia.  
Stephen Kirkman, Department of Environmental Affairs, South Africa.  
Dmitry Kishkinev, Oldenburg University, Germany.  
Ophir Klein, The University of California, USA.  
Michael Klymkowsky, University of Colorado, USA.  
Jason Knott, Michigan State University, USA.  
Bon-Kyoung Koo, University of Cambridge, UK.  
Patricia Kramer, University of Washington, USA.  
Skirmantas Kriaucionis, University of Oxford, UK.  
Bill Kristan, University of California San Diego, USA.  
Warren Kruger, Fox Chase Cancer Center, USA.  
Hans-Georg Kuhn, University of Gothenburg, Sweden.  
Sandeep Kumar, Emory University, USA.  
Sanjay Kumar, Berkeley University, USA.  
Markus Kunze, Medical University of Vienna, Austria.  
Charalambos Kyriacou, University of Leicester, UK.  
Pavithra Lakshminarasimhan, University of Cambridge, UK.  
Julian Lange, Memorial Sloan Kettering Cancer Center, USA.  
Paul Lasko, McGill University, Canada.

Emilie Legue, Yale University, USA.  
Aimin Liu, Penn State University, USA.  
Srdjan Lopicic, Faculty of Medicine Belgrade, Serbia.  
Lukas Mach, Universität für Bodenkultur Wien, Austria.  
Scott, Magness, University of North Carolina at Chapel Hill, USA.  
Marcos Malumbres, Centro Nacional de Investigaciones Oncologicas (CNIO), Spain.  
Ben Mans, Onderstepoort Veterinary Institute, South Africa.  
Gemma Marfany, Universitat de Barcelona, Spain.  
Michele Markstein, University of Massachusetts Amherst, USA.  
Giancarlo Marra, University of Zurich, Switzerland.  
Justin Marshall, University of Queensland, Australia.  
Jose-Luis Martinez-Guitarte, Universidad Nacional de Educacion a Distancia, Spain.  
Michiyuki Matsuda, Kyoto University, Japan.  
Melissa Meadows, Eberhard Karls Universität Tübingen, Germany.  
Cathy Mendelsohn, Columbia University, USA.  
Allen Mensinger, University of Minnesota Duluth, USA.  
Melania Mercado-Pimentel, University of Arizona, USA.  
Edmundo Mercado-Silva, Universidad Autónoma de Querétaro, Mexico.  
Andrea Merdes, CNRS, France.  
Isabelle Migeotte, IRIBHM, Belgium.  
Lucile Miquerol, IBDM, France.  
Rajesh Miranda, Texas A&M Health Science Center, USA.  
Sally Moody, George Washington University, USA.  
Bernard Moussian, Interfaculty Institute for Cell Biology, Germany.  
Carla Mulas, University of Cambridge, UK.  
Hans-Arno Muller, University of Dundee, UK.  
Daniel Mulvihill, University of Kent, UK.  
Silvia Munoz-Descalzo, University of Bath, UK.  
Jorge Muschietti, INGEBI University of Buenos Aires, Argentina.  
Kirk Mykytyn, The Ohio State University, USA.  
Ivan Nabi, University of British Columbia, Canada.  
Ryu Nagahara, National Institute of Fitness and Sports in Kanoya, Japan.  
Ximena Nelson, University of Canterbury, New Zealand.  
Lori Neuman-Lee, Utah State University, USA.  
Andres Norambuena, University of Virginia, USA.  
Scott Nowak, Kennesaw State University, USA.  
Hiroki Ochi, Tokyo Medical and Dental University, Japan.  
Damien O'Halloran, George Washington University, USA.  
Naoki Okubo, Kyoto Prefectural University of Medicine, Japan.  
Raquel Oliveira, Instituto Gulbenkian de Ciência, Portugal.  
David Owen, University of Cambridge, UK.  
Eva P. Cuevas, Universidad Autónoma de Madrid, Spain.  
Isabel Palacios, University of Cambridge, UK.

James Palis, University of Rochester Medical Center, USA.  
Maddy Parsons, Kings College London, UK.  
Yale Passamaneck, University of Hawaii, USA.  
Michael Passineau, Allegheny General Hospital, USA.  
Samantha Patrick, University of Liverpool, UK.  
James Patton, Vanderbilt University, USA.  
Dennis Pauls, University of Wuerzburg, Germany.  
Sandeep Pawar, The University of Chicago, USA.  
Peter Peduzzi, University of Vienna, Austria  
Mark Peifer, University of North Carolina, USA.  
Francisco Peñagaricano, University of Florida, USA.  
Muriel Perron, Universite Paris Sud, France.  
Donna Peters, University of Wisconsin, USA.  
Nathan Phillips, Royal Veterinary College, UK.  
Anna Philpott, University of Cambridge, UK.  
Ross Poche, Baylor College of Medicine, USA.  
Edwin Price, University of Wisconsin - Madison, USA.  
Ruben Quintana-Cabrera, University of Padova, Italy  
Derek Radisky, Mayo Clinic Cancer Center, USA.  
Sridhar Ravi, RMIT University, Australia.  
Tommer Ravid, Hebrew University of Jerusalem, Israel.  
Krishanu Ray, Tata Institute of Fundamental Research, India.  
Kirthi Reddy, University of California San Diego, USA.  
Roberto Refinetti, Boise State University, USA.  
Kimberly Reidy, Albert Einstein College of Medicine, USA.  
Stefan Reiser, Thunen Institute, Germany.  
Fabian Rentzsch, University of Bergen, Norway.  
David Roberts, NCI, NIH, USA.  
Dan Rocca, University of Bristol, UK.  
Ed Schmidt, Montana State University, USA.  
Joachim Scholz-Starke, Center for Synaptic Neuroscience, Italy.  
Isa Schön, Royal Belgian Institute of Natural Science, Belgium.  
Patricia Schulte, University of British Columbia, Canada.  
Joni Seeling, Sam Houston State University, USA.  
Paul Shaw, Washington University School of Medicine, USA.  
Roy Sillitoe, Baylor College of Medicine, USA.  
Daniel Silva, Instituto Federal Goiano, Brazil.  
Maria Eugenia Soriano, Dulbecco Telethon Institute, Venetian Institute of Molecular  
Medicine, Italy.  
Massimo Squatrito, CNIO Cancer Cell Biology Programme, Spain.  
Anton Stabentheiner, Universität Graz, Austria.  
Tamara Stawicki, University of Washington, USA.  
Antoine Stier, Institut Pluridisciplinaire Hubert Curien, France.

Johannes Stökl, University of Regensburg, Germany.  
Alexandra Surcel, Johns Hopkins University School of Medicine, USA.  
John Swallow, University of Colorado Denver, USA.  
Karthik Swaminathan, CRUK Beatson Institute, UK.  
Sean Sweeney, University of York, UK.  
Masanori Taira, University of Tokyo, Graduate School of Science, Japan.  
Nobuyuki Takei, Niigata University, Japan.  
Markus Tamas, University of Gothenburg, Sweden.  
Ozgur Tataroglu, University of Massachusetts Medical School, USA.  
Michael Taylor, Cardiff University, UK.  
Rohan Teasdale, The University of Queensland, Australia.  
William Theurkauf, University of Massachusetts Medical School, USA.  
Christoph Thiele, University of Bonn, Germany.  
Stefan Thor, Linköping University, Sweden  
Bret Tobalske, University of Montana, USA.  
Dhanendra Tomar, Temple University, USA.  
Marc-Olivier Trepanier, University of Toronto, Canada.  
Jason Triplett, Childrens National Health System, USA.  
Sean Tuck, University of Oxford, UK.  
Teresa Valencak, Veterinary University Vienna, Austria  
Jaap van Buul, Sanquin Research and Landsteiner Laboratory, Netherlands.  
Jason Vance, College of Charleston, USA.  
Sue Vaughan, Oxford Brookes University, UK.  
Isabelle Vernos, ICREA-CRG, Spain.  
Monica Vetter, University of Utah, USA.  
Cristina Vieira, Universidade do Porto, Portugal.  
Stephane Vincent, Ecole Normale Supérieure de Lyon, France.  
Peter Vize, University of Calgary, Canada.  
Kris Vleminckx, Inflammation Research Center (IRC), Belgium.  
Andrea Vortkamp, Abteilung fuer Entwicklungsbiologie I, Germany.  
Alan Wainman, University of Oxford, UK.  
James Wakefield, University of Exeter, UK.  
Douglas Warrick, Oregon State University, USA.  
Elizabeth Washington, The University of Melbourne, Australia.  
Karen Westerman, Brigham and Women's Hospital, USA.  
Tanya Whitfield, University of Sheffield, UK.  
Christopher Wilson, Imperial College London, UK.  
Roswitha Wiltschko, J.W.Goethe-Universität Frankfurt, Germany.  
Richard Wingate, Kings College London, UK.  
Andreas Wodarz, University of Cologne, Germany  
Jonas Wolff, Christian-Albrechts-University of Kiel, Germany  
Greg Wray, Duke University, USA.  
Ting Xie, Stowers Institute, USA.

Yojiro Yamanaka, McGill University, Goodman Cancer Center, Canada.

Masakazu Yamasaki, Akita University Graduate School of Medicine, Japan.

Yukiko Yamashita, University of Michigan, Ann Arbor, USA.

Wenyi Yan, Monash University, Australia.

Patricia Ybot-Gonzalez, Hospital Virgen del Rocio/IBIS/Universidad de Sevilla, Spain.

Zhang Ying, Chinese Academy of Sciences, China.

Yong Zhang, Institute of Genetics and Developmental Biology, Chinese Academy of Sciences, China.

Christiane Zweier, Universitätsklinikum Erlangen, Germany.
